# Supplementary material for: Unveiling the impact of enhanced hydrophobicity of ZIF-71 on butanol purification: insights from experimental and molecular simulations
Source: Royal Society of Chemistry journal article supplement (doi:10.1039/d4dt02485k), 2024-01-01
Supplement: d4dt02485k1.pdf [file d4dt02485k1.pdf]

## Electronic Supplementary Information (ESI)

# Unveiling the Impact of Enhanced Hydrophobicity in ZIF-71 on Butanol Purification: Insights from Experimental and Molecular Simulations

Norma Tiempos-Flores,<sup>a</sup> Oscar I. Arillo-Flores,<sup>b</sup> Eugenio Hernández-Fernández,<sup>a</sup> Víctor M. Ovando-Medina,<sup>c</sup> Marco A. Garza-Navarro,<sup>d</sup> Sandra Pioquito-García,<sup>a</sup> Nancy E. Davila-Guzman<sup>a,\*</sup>

Contact information for corresponding authors (\*)

Nancy Elizabeth Dávila Guzmán, Ph.D.

Autonomous University of Nuevo Leon

Tel/fax: (81) 83294000. Ext. 6281

E-mail address: nancy.davilagz@uanl.edu.mx

The cell parameters were refined using the Le Bail pattern fitting method. Initial refinement parameters were based on those from ZIF-71.<sup>1</sup> Peak profiles were calculated within ten times the full width at half maximum (FWHM) and pseudo-Voigt peak shape functions. A third-order polynomial fitting modelled the background.

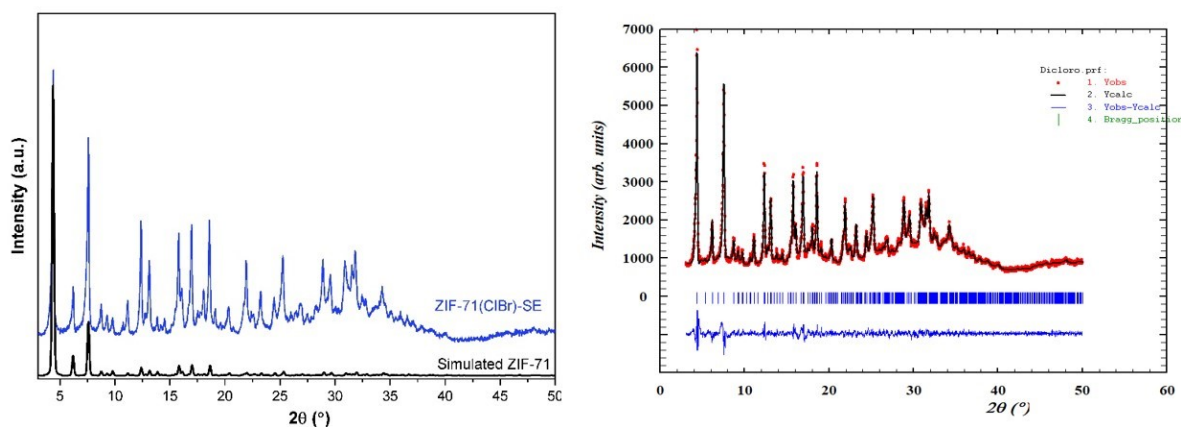

Fig. S1 XRD patterns of ZIF-71(ClBr)-SE and comparison to simulated ZIF-71 (left), profile refinement plots from  $2\theta = 3$  to  $50^\circ$  for ZIF-71(ClBr)-SE (right). Experimental, calculated and difference profiles, and allowed Bragg peaks are shown.

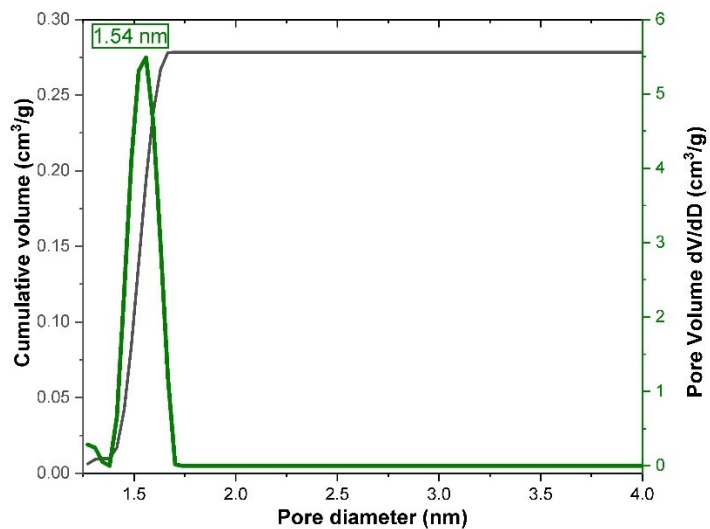

Fig. S2 DFT pore distribution of ZIF-71(ClBr)-SE.

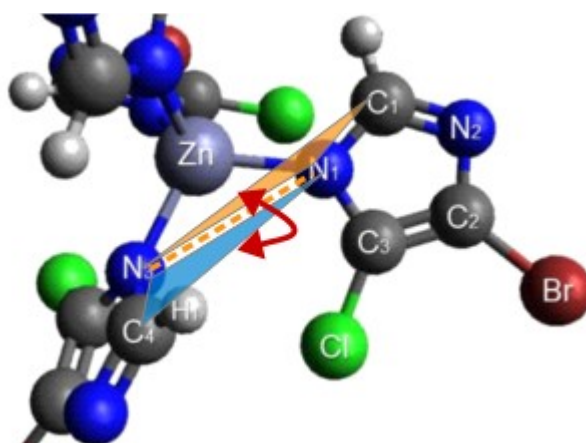

Fig. S3 The dihedral angle among C1-N1-N3-C4 atoms can be described as the angle between two planes, the first plane defined by C1-N1-N3 group of atoms and the second one by N1-N3-C4.

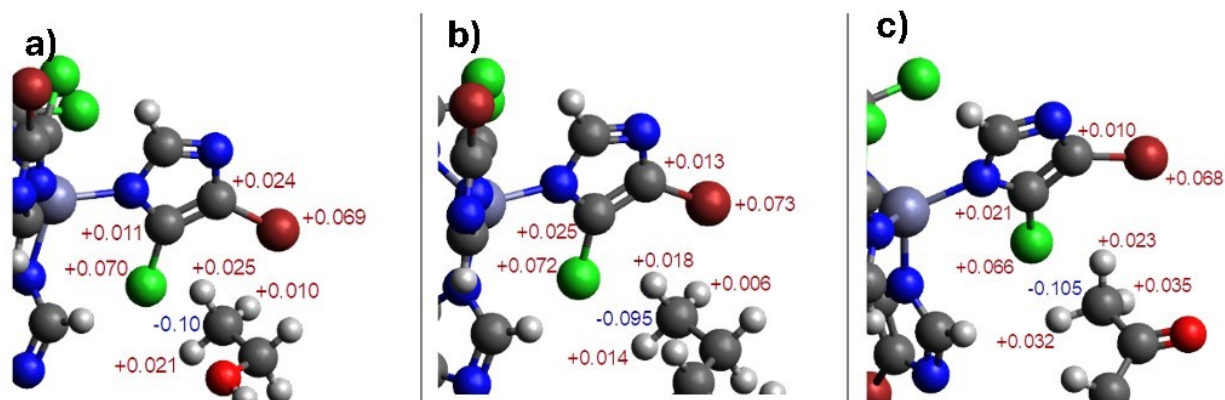

Fig. S4 Partial charges of the system a) ZIF-71(ClBr)-SE – ethanol, b) ZIF-71(ClBr)-SE – butanol and, c) ZIF-71(ClBr)-SE – acetone.

Table S1. Total energy and geometrical parameters for optimized structures of ZIF-71 and ZIF-71(ClBr)-SE.

| MOF             | Energy (eV) | Optimized Geometries |                    |                    |                                |                                |                                |                                   |                                                    |                                    |          |
|-----------------|-------------|----------------------|--------------------|--------------------|--------------------------------|--------------------------------|--------------------------------|-----------------------------------|----------------------------------------------------|------------------------------------|----------|
|                 |             | Distances (Å)        |                    |                    |                                |                                |                                | Angles (°)                        |                                                    |                                    |          |
|                 |             | Zn-N <sub>1</sub>    | C <sub>2</sub> -Br | C <sub>3</sub> -Cl | C <sub>2</sub> -C <sub>3</sub> | C <sub>3</sub> -N <sub>1</sub> | C <sub>2</sub> -N <sub>2</sub> | N <sub>3</sub> -Zn-N <sub>3</sub> | C <sub>1</sub> -N <sub>1</sub> (Zn)-C <sub>3</sub> | N <sub>1</sub> -C <sub>3</sub> -Cl | Dihedral |
| ZIF-71          | -9450.6     | 2.03                 | NA                 | 1.71               | 1.43                           | 1.36                           | 1.35                           | 110.0                             | 104.4                                              | 124.3                              | 114.0    |
| ZIF-71(ClBr)-SE | -9220.1     | 2.02                 | 1.86               | 1.71               | 1.43                           | 1.36                           | 1.35                           | 109.4                             | 103.4                                              | 124.0                              | 117.0    |

Table S2. Energies of interaction and geometrical parameters for optimized structures of alcohol-ZIF systems.

| MOF               | Alcohol | Orientation toward MOF | Interaction Energy Kcal/mol | Optimized Geometries          |                                     |                                  |                                     |                                           |                  |                      |                                      |                    |
|-------------------|---------|------------------------|-----------------------------|-------------------------------|-------------------------------------|----------------------------------|-------------------------------------|-------------------------------------------|------------------|----------------------|--------------------------------------|--------------------|
|                   |         |                        |                             | Intermolecular distances (Å)  |                                     |                                  |                                     |                                           |                  |                      |                                      | Angle (°)          |
|                   |         |                        |                             | Alcohol C-C <sub>3</sub> (Cl) | Alcohol C-C <sub>2</sub> (Cl or Br) | Alcohol C-Cl C <sub>3</sub> (Cl) | (Alcohol C)H-Cl C <sub>3</sub> (Cl) | (Alcohol C)H-Cl C <sub>2</sub> (Cl or Br) | O-C <sub>2</sub> | (OH)H-N <sub>2</sub> | H <sub>1</sub> -C <sub>alcohol</sub> | Change in dihedral |
| ZIF -71           | BuOH    | Alkyl                  | -4.4                        | 3.66                          | 3.89                                | 3.52                             | 3.13                                | 2.93                                      | -                | -                    | 3.24                                 | -18.9              |
|                   |         | Hydroxy                | -15.1                       | 3.85                          | 3.68                                | -                                | 3.30                                | 3.00                                      | 3.12             | 2.56                 | 2.10                                 | -43.7              |
| ZIF -71 (ClBr)-SE |         | Alkyl                  | -5.4                        | 3.62                          | 3.85                                | 3.56                             | 3.07                                | 3.05                                      | -                | -                    | 3.51                                 | -11.5              |
|                   |         | Hydroxy                | -13.3                       | 3.78                          | 3.74                                | -                                | 3.17                                | 3.20                                      | 3.21             | 2.70                 | 2.08                                 | -46.0              |
| ZIF -71           | EtOH    | Alkyl                  | -4.0                        | 3.66                          | 3.90                                | 3.51                             | 3.10                                | 2.95                                      | -                | -                    | 3.26                                 | -17.5              |
|                   |         | Hydroxy                | -13.8                       | 3.83                          | 3.66                                | -                                | 3.29                                | 2.98                                      | 3.12             | 2.54                 | 2.11                                 | -43.6              |
| ZIF -71 (ClBr)-SE |         | Alkyl                  | -4.3                        | 3.64                          | 3.86                                | 3.58                             | 3.14                                | 3.04                                      | -                | -                    | 3.52                                 | -11.8              |
|                   |         | Hydroxy                | -13.2                       | 3.77                          | 3.72                                | -                                | 3.17                                | 3.17                                      | 3.31             | 2.68                 | 2.09                                 | -46.1              |

Table S3. Intramolecular geometrical parameters of ZIFs for optimized structures of alcohol-ZIF systems.

| MOF               | Solute  | Orientation toward MOF | Interaction Energy Kcal/mol | Change in dihedral angle |
|-------------------|---------|------------------------|-----------------------------|--------------------------|
| ZIF -71           | Butanol | Alkyl                  | -4.4                        | -18.9                    |
|                   |         | Hydroxy                | -15.1                       | -43.7                    |
| ZIF -71 (ClBr)-SE |         | Alkyl                  | -5.4                        | -11.5                    |
|                   |         | Hydroxy                | -13.3                       | -46.0                    |
| ZIF -71           | Ethanol | Alkyl                  | -4.0                        | -17.5                    |
|                   |         | Hydroxy                | -13.8                       | -43.6                    |
| ZIF -71 (ClBr)-SE |         | Alkyl                  | -4.3                        | -11.8                    |
|                   |         | Hydroxy                | -13.2                       | -46.1                    |

Table S4. Hirshfeld Atomic charges of the system ZIF-71 and ZIF-71(ClBr)-SE with butanol, ethanol and acetone.

|                |         | Butanol                     |        |         |                          |        |        |
|----------------|---------|-----------------------------|--------|---------|--------------------------|--------|--------|
|                |         | Alkyl                       |        |         | Hydroxy                  |        |        |
|                |         | ZIF-71(ClBr)-SE             | ZIF-71 |         | ZIF-71(ClBr)-SE          | ZIF-71 |        |
| Atom #         | Species | Charge                      |        | Species | Charge                   |        |        |
| MOF            | 1       | Zn                          | 0.403  | 0.404   | Zn                       | 0.4    | 0.400  |
|                | 2       | C                           | 0.017  | 0.017   | C                        | 0.023  | 0.023  |
|                | 3       | C                           | 0.005  | 0.022   | C                        | 0.01   | 0.026  |
|                | 4       | C                           | 0.033  | 0.035   | C                        | 0.04   | 0.040  |
|                | 5       | C                           | 0.037  | 0.038   | C                        | 0.036  | 0.037  |
|                | 6       | C                           | 0.008  | 0.024   | C                        | 0.008  | 0.024  |
|                | 7       | C                           | 0.019  | 0.020   | C                        | 0.021  | 0.021  |
|                | 8       | C                           | 0.037  | 0.039   | C                        | 0.041  | 0.040  |
|                | 9       | C                           | 0.007  | 0.023   | C                        | 0.007  | 0.022  |
|                | 10      | C                           | 0.018  | 0.018   | C                        | 0.018  | 0.018  |
|                | 11      | <b>C2</b>                   | 0.013  | 0.027   | <b>C2</b>                | 0.004  | 0.022  |
|                | 12      | <b>C3</b>                   | 0.025  | 0.023   | <b>C3</b>                | 0.014  | 0.015  |
|                | 13      | C                           | 0.036  | 0.037   | C                        | 0.034  | 0.036  |
|                | 14      | H                           | 0.045  | 0.046   | H                        | 0.022  | 0.021  |
|                | 15      | H                           | 0.049  | 0.049   | H                        | 0.045  | 0.045  |
|                | 16      | H                           | 0.045  | 0.045   | H                        | 0.046  | 0.046  |
|                | 17      | H                           | 0.026  | 0.026   | H                        | 0.033  | 0.035  |
|                | 18      | N                           | -0.132 | -0.132  | N                        | -0.128 | -0.128 |
|                | 19      | N                           | -0.179 | -0.179  | N                        | -0.172 | -0.170 |
|                | 20      | N                           | -0.177 | -0.177  | N                        | -0.177 | -0.177 |
|                | 21      | N2                          | -0.133 | -0.133  | N                        | -0.131 | -0.131 |
|                | 22      | N                           | -0.178 | -0.177  | N                        | -0.177 | -0.178 |
|                | 23      | N                           | -0.132 | -0.132  | N                        | -0.131 | -0.131 |
|                | 24      | <b>N1</b>                   | -0.176 | -0.176  | <b>N1</b>                | -0.18  | -0.179 |
|                | 25      | <b>N2</b>                   | -0.13  | -0.132  | <b>N2</b>                | -0.13  | -0.129 |
|                | *26     | Br                          | 0.052  | 0.035   | Br                       | 0.057  | 0.038  |
|                | 27      | Cl                          | 0.046  | 0.050   | Cl                       | 0.049  | 0.050  |
|                | *28     | Br                          | 0.057  | 0.038   | Br                       | 0.057  | 0.038  |
|                | 29      | Cl                          | 0.049  | 0.050   | Cl                       | 0.045  | 0.050  |
|                | *30     | Br                          | 0.055  | 0.037   | Br                       | 0.055  | 0.037  |
|                | 31      | Cl                          | 0.058  | 0.061   | Cl                       | 0.055  | 0.061  |
|                | *32     | <b>Br</b>                   | 0.073  | 0.047   | <b>Br</b>                | 0.055  | 0.047  |
|                | 33      | <b>Cl</b>                   | 0.072  | 0.075   | <b>Cl</b>                | 0.056  | 0.075  |
| Butanol        | 34      | <b>C</b>                    | -0.044 | -0.038  | <b>O</b>                 | -0.151 | -0.144 |
|                | 35      | <b>H</b>                    | 0.018  | 0.020   | <b>C</b>                 | -0.049 | -0.048 |
|                | 36      | <b>C<sub>(methyl)</sub></b> | -0.095 | -0.094  | <b>H<sub>(OH)</sub></b>  | 0.106  | 0.106  |
|                | 37      | <b>H</b>                    | 0.006  | 0.003   | <b>C<sub>(C-O)</sub></b> | 0.012  | 0.014  |
|                | 38      | <b>H</b>                    | 0.014  | 0.020   | <b>H</b>                 | -0.003 | 0.002  |
|                | 39      | <b>H</b>                    | 0.019  | 0.025   | <b>H</b>                 | 0.019  | 0.020  |
|                | 40      | <b>C</b>                    | -0.053 | -0.053  | <b>H</b>                 | 0.022  | 0.021  |
|                | 41      | <b>H</b>                    | 0.024  | 0.024   | <b>H</b>                 | 0.026  | 0.028  |
|                | 42      | <b>H</b>                    | 0.02   | 0.025   | <b>C</b>                 | -0.037 | -0.043 |
|                | 43      | <b>H</b>                    | 0.027  | 0.020   | <b>H</b>                 | 0.024  | 0.019  |
|                | 44      | <b>C</b>                    | 0.015  | 0.013   | <b>C</b>                 | -0.085 | -0.087 |
|                | 45      | <b>O</b>                    | -0.177 | -0.185  | <b>H</b>                 | 0.023  | 0.021  |
|                | 46      | <b>H</b>                    | 0.02   | 0.015   | <b>H</b>                 | 0.031  | 0.029  |
|                | 47      | <b>H</b>                    | 0.029  | 0.029   | <b>H</b>                 | 0.027  | 0.027  |
|                | 48      | <b>H</b>                    | 0.127  | 0.125   | <b>H</b>                 | 0.028  | 0.025  |
| MOF Charge     |         | 0.048                       | 0.048  |         | 0.007                    | 0.008  |        |
| Butanol Charge |         | -0.048                      | -0.048 |         | -0.007                   | -0.008 |        |

\* In this case for ZIF-71 correspond to a Cl atom.

|                |                       | Etanol          |        |                    |        |        |
|----------------|-----------------------|-----------------|--------|--------------------|--------|--------|
|                |                       | Alkyl           |        | Hydroxy            |        |        |
|                |                       | ZIF-71(ClBr)-SE | ZIF-71 |                    |        |        |
| Atom #         | Species               | Charge          |        | Species            | Charge |        |
| 1              | N1                    | -0.13           | -0.131 | N1                 | -0.13  | -0.129 |
| 2              | C3                    | 0.024           | 0.025  | C3                 | 0.014  | 0.015  |
| 3              | C2                    | 0.011           | 0.029  | C2                 | 0.004  | 0.022  |
| 4              | N2                    | -0.177          | -0.174 | N2                 | -0.18  | -0.179 |
| 5              | C                     | 0.036           | 0.039  | C                  | 0.034  | 0.036  |
| *6             | Br                    | 0.069           | 0.054  | Br                 | 0.055  | 0.04   |
| 7              | Cl                    | 0.07            | 0.076  | Cl                 | 0.056  | 0.061  |
| 8              | Zn                    | 0.404           | 0.404  | Zn                 | 0.401  | 0.4    |
| 9              | N                     | -0.131          | -0.132 | N                  | -0.131 | -0.131 |
| 10             | C                     | 0.04            | 0.04   | C                  | 0.041  | 0.04   |
| 11             | N                     | -0.176          | -0.176 | N                  | -0.177 | -0.178 |
| 12             | C                     | 0.008           | 0.024  | C                  | 0.007  | 0.022  |
| 13             | C                     | 0.019           | 0.019  | C                  | 0.018  | 0.018  |
| *14            | Br                    | 0.057           | 0.038  | Br                 | 0.054  | 0.034  |
| 15             | Cl                    | 0.059           | 0.061  | Cl                 | 0.055  | 0.055  |
| 16             | N                     | -0.132          | -0.132 | N                  | -0.128 | -0.128 |
| 17             | C                     | 0.017           | 0.016  | C                  | 0.023  | 0.023  |
| 18             | C                     | 0.006           | 0.02   | C                  | 0.011  | 0.026  |
| 19             | N                     | -0.177          | -0.179 | N                  | -0.171 | -0.169 |
| 20             | C                     | 0.036           | 0.033  | C                  | 0.041  | 0.041  |
| 21             | Cl                    | 0.046           | 0.046  | Cl                 | 0.048  | 0.048  |
| *22            | Br                    | 0.051           | 0.03   | Br                 | 0.059  | 0.038  |
| 23             | N                     | -0.133          | -0.133 | N                  | -0.131 | -0.131 |
| 24             | C                     | 0.036           | 0.037  | C                  | 0.035  | 0.036  |
| 25             | N                     | -0.178          | -0.178 | N                  | -0.178 | -0.178 |
| 26             | C                     | 0.007           | 0.023  | C                  | 0.008  | 0.024  |
| 27             | C                     | 0.018           | 0.019  | C                  | 0.021  | 0.021  |
| *28            | Br                    | 0.054           | 0.035  | Br                 | 0.056  | 0.035  |
| 29             | Cl                    | 0.047           | 0.048  | Cl                 | 0.044  | 0.046  |
| 30             | H                     | 0.048           | 0.045  | H                  | 0.045  | 0.045  |
| 31             | H                     | 0.046           | 0.049  | H                  | 0.046  | 0.046  |
| 32             | H                     | 0.049           | 0.046  | H                  | 0.033  | 0.035  |
| 33             | H                     | 0.026           | 0.027  | H                  | 0.023  | 0.022  |
| 34             | C <sub>(methyl)</sub> | -0.1            | -0.101 | O                  | -0.152 | -0.151 |
| 35             | C                     | 0.015           | 0.014  | C                  | -0.092 | -0.093 |
| 36             | O                     | -0.184          | -0.181 | H <sub>(OH)</sub>  | 0.105  | 0.104  |
| 37             | H                     | 0.025           | 0.025  | C <sub>(C-O)</sub> | 0.015  | 0.015  |
| 38             | H                     | 0.01            | 0.009  | H                  | -0.001 | 0.022  |
| 39             | H                     | 0.021           | 0.023  | H                  | 0.021  | 0      |
| 40             | H                     | 0.018           | 0.018  | H                  | 0.035  | 0.035  |
| 41             | H                     | 0.018           | 0.017  | H                  | 0.032  | 0.032  |
| 42             | H                     | 0.128           | 0.129  | H                  | 0.028  | 0.027  |
| MOF Charge     |                       | 0.049           | 0.047  |                    | 0.008  | 0.008  |
| Ethanol Charge |                       | -0.049          | -0.047 |                    | -0.008 | -0.008 |

\* In this case for ZIF-71 correspond to a Cl atom.

|                |     | Acetone           |                 |               |                   |                 |        |                   |                 |        |
|----------------|-----|-------------------|-----------------|---------------|-------------------|-----------------|--------|-------------------|-----------------|--------|
|                |     | Alkyl             |                 |               | Alkyl             |                 |        | Carbonyl          |                 |        |
|                |     | Species           | ZIF-71(ClBr)-SE | ZIF-71        | Species           | ZIF-71(ClBr)-SE | ZIF-71 | Species           | ZIF-71(ClBr)-SE | ZIF-71 |
| Atom #         |     | Charge            |                 |               | Charge            |                 |        | Charge            |                 |        |
| MOF            | 1   | C                 | 0.017           | 0.017         | C                 | 0.021           | 0.021  | C                 | 0.019           | 0.019  |
|                | 2   | N                 | -0.132          | -0.133        | N                 | -0.132          | -0.131 | N                 | -0.132          | -0.128 |
|                | 3   | C                 | 0.005           | 0.031         | C                 | 0.037           | 0.042  | C                 | 0.034           | 0.043  |
|                | 4   | N                 | -0.18           | -0.177        | N                 | -0.177          | -0.175 | N                 | -0.18           | -0.178 |
|                | 5   | C                 | 0.03            | 0.025         | C                 | 0.009           | 0.026  | C                 | 0.006           | 0.022  |
|                | 6   | Zn                | 0.403           | 0.403         | Zn                | 0.404           | 0.404  | Zn                | 0.407           | 0.406  |
|                | 7   | N                 | -0.132          | -0.132        | N                 | -0.131          | -0.132 | N                 | -0.129          | -0.128 |
|                | 8   | C                 | 0.018           | 0.018         | C                 | 0.018           | 0.017  | C                 | 0.022           | 0.013  |
|                | 9   | C                 | 0.007           | 0.02          | C                 | 0.006           | 0.021  | C                 | 0.009           | 0.019  |
|                | 10  | C                 | 0.036           | 0.035         | N                 | -0.179          | -0.176 | N                 | -0.179          | -0.175 |
|                | 11  | N                 | -0.178          | -0.18         | C                 | 0.032           | 0.034  | C                 | 0.039           | 0.038  |
|                | 12  | Cl                | 0.047           | 0.049         | Cl                | 0.05            | 0.071  | Cl                | 0.049           | 0.057  |
|                | *13 | Br                | 0.053           | 0.034         | Br                | 0.054           | 0.05   | Br                | 0.053           | 0.035  |
|                | *14 | Br                | 0.057           | 0.04          | Br                | 0.059           | 0.04   | Br                | 0.05            | 0.033  |
|                | 15  | Cl                | 0.059           | 0.053         | Cl                | 0.049           | 0.062  | Cl                | 0.042           | 0.058  |
|                | 16  | N                 | <b>-0.132</b>   | <b>-0.132</b> | N                 | -0.132          | -0.132 | N                 | -0.127          | -0.132 |
|                | 17  | C                 | <b>0.021</b>    | <b>0.021</b>  | C                 | 0.016           | 0.02   | C                 | 0.014           | 0.02   |
|                | 18  | C                 | <b>0.01</b>     | <b>0.026</b>  | C                 | 0.006           | 0.024  | C                 | 0.004           | 0.022  |
|                | 19  | N                 | <b>-0.177</b>   | <b>-0.177</b> | N                 | -0.177          | -0.177 | N                 | -0.174          | -0.18  |
|                | 20  | C                 | <b>0.034</b>    | <b>0.039</b>  | C                 | 0.034           | 0.038  | C                 | 0.037           | 0.035  |
|                | *21 | Br                | <b>0.068</b>    | <b>0.068</b>  | Cl                | 0.062           | 0.049  | Cl                | 0.053           | 0.044  |
|                | 22  | Cl                | <b>0.066</b>    | <b>0.045</b>  | Br                | 0.069           | 0.038  | Br                | 0.055           | 0.032  |
|                | 23  | N                 | -0.132          | -0.132        | N                 | -0.13           | -0.132 | N                 | -0.128          | -0.129 |
|                | 24  | C                 | 0.038           | 0.038         | C                 | 0.041           | 0.019  | C                 | 0.042           | 0.022  |
|                | 25  | N                 | -0.176          | -0.177        | C                 | 0.009           | 0.022  | C                 | 0.007           | 0.025  |
|                | 26  | C                 | 0.009           | 0.023         | N                 | -0.175          | -0.179 | N                 | -0.178          | -0.179 |
|                | 27  | C                 | 0.02            | 0.021         | C                 | 0.021           | 0.033  | C                 | 0.019           | 0.04   |
|                | *28 | Br                | 0.059           | 0.037         | Br                | 0.06            | 0.051  | Br                | 0.051           | 0.053  |
|                | 29  | Cl                | 0.051           | 0.061         | Cl                | 0.061           | 0.035  | Cl                | 0.054           | 0.035  |
|                | 30  | H                 | 0.041           | 0.042         | H                 | 0.042           | 0.043  | H                 | 0.021           | 0.022  |
|                | 31  | H                 | 0.049           | 0.049         | H                 | 0.047           | 0.048  | H                 | 0.046           | 0.045  |
|                | 32  | H                 | 0.044           | 0.045         | H                 | 0.046           | 0.046  | H                 | 0.048           | 0.049  |
|                | 33  | H                 | 0.026           | 0.026         | H                 | 0.026           | 0.027  | H                 | 0.03            | 0.029  |
| Acetone        | 34  | C                 | -0.105          | -0.105        | C                 | -0.101          | -0.104 | C                 | -0.1            | -0.1   |
|                | 35  | C <sub>(co)</sub> | 0.154           | 0.155         | C <sub>(co)</sub> | 0.154           | 0.156  | C <sub>(co)</sub> | 0.163           | 0.162  |
|                | 36  | C                 | -0.096          | -0.095        | O                 | -0.2            | -0.199 | O                 | -0.177          | -0.098 |
|                | 37  | O                 | -0.204          | -0.202        | C                 | -0.098          | -0.097 | C                 | -0.098          | -0.179 |
|                | 38  | H                 | 0.023           | 0.023         | H                 | 0.014           | 0.016  | H                 | 0.025           | 0.027  |
|                | 39  | H                 | 0.035           | 0.037         | H                 | 0.046           | 0.046  | H                 | 0.047           | 0.047  |
|                | 40  | H                 | 0.032           | 0.034         | H                 | 0.033           | 0.027  | H                 | 0.035           | 0.034  |
|                | 41  | H                 | 0.044           | 0.044         | H                 | 0.04            | 0.042  | H                 | 0.039           | 0.04   |
|                | 42  | H                 | 0.041           | 0.041         | H                 | 0.04            | 0.041  | H                 | 0.043           | 0.042  |
|                | 43  | H                 | 0.045           | 0.045         | H                 | 0.026           | 0.027  | H                 | 0.037           | 0.037  |
| MOF Charge     |     |                   | 0.030           | 0.024         |                   |                 |        | -0.015            | -0.013          |        |
| Acetone Charge |     |                   | -0.030          | -0.024        |                   |                 |        | 0.015             | 0.013           |        |

Table S5. Energies of interaction and geometrical parameters for optimized structures of acetone-ZIF systems.

| MOF               | Acetone Orientation toward MOF | Pattern   | Interaction Energy (Kcal/mol) | Optimized Geometries                 |                                    |                                     |                                     |                                      |                                      |                                         |                                         |                                        |                  |                   |                                | Angle (°) |                    |
|-------------------|--------------------------------|-----------|-------------------------------|--------------------------------------|------------------------------------|-------------------------------------|-------------------------------------|--------------------------------------|--------------------------------------|-----------------------------------------|-----------------------------------------|----------------------------------------|------------------|-------------------|--------------------------------|-----------|--------------------|
|                   |                                |           |                               | Intermolecular distances (Å)         |                                    |                                     |                                     |                                      |                                      |                                         |                                         |                                        |                  |                   |                                |           | Change in dihedral |
|                   |                                |           |                               | C <sub>CM</sub> -C <sub>3</sub> (Cl) | C <sub>CM</sub> -Cl C <sub>3</sub> | C <sub>CM</sub> -C <sub>2</sub> (X) | C <sub>FM</sub> -C <sub>2</sub> (X) | C <sub>CM</sub> -X (C <sub>2</sub> ) | C <sub>FM</sub> -X (C <sub>2</sub> ) | (C <sub>CM</sub> )H-X (C <sub>2</sub> ) | (C <sub>FM</sub> )H-X (C <sub>2</sub> ) | (C <sub>4</sub> )H-H(C <sub>CM</sub> ) | O-C <sub>3</sub> | H <sub>1</sub> -O | C <sub>O</sub> -C <sub>2</sub> |           |                    |
| ZIF -71           | Methyl                         | Non-Symm  | -13.3                         | 3.59                                 | 3.54                               | 3.81                                | -                                   | 3.81                                 | -                                    | 3.37                                    | -                                       | 2.41                                   | -                | -                 | -                              | -10.1     |                    |
|                   | Methyl                         | Symm      | -4.9                          | 3.58                                 | 3.62                               | 3.66                                | 4.40                                | 3.78                                 | 3.79                                 | 3.03                                    | 2.82                                    | 2.52                                   | -                | -                 | 4.07                           | -15.2     |                    |
|                   | Carbonyl                       | Semi-Symm | -14.5                         | 3.84                                 | 4.01                               | 3.71                                | 3.67                                | 3.68                                 | 4.13                                 | 2.87                                    | 3.35                                    | -                                      | 3.24             | 2.05              | 3.35                           | -37.4     |                    |
| ZIF -71 (ClBr)-SE | Methyl                         | Non-Symm  | -4.3                          | 3.63                                 | 3.60                               | 3.80                                | -                                   | 3.99                                 | -                                    | 3.01                                    | -                                       | 2.73                                   | -                | -                 | -                              | -16.2     |                    |
|                   | Methyl                         | Non-Symm  | -2.8                          | 3.59                                 | 3.55                               | 3.81                                | -                                   | 4.05                                 | -                                    | 3.45                                    | -                                       | 2.41                                   | -                | -                 | -                              | -12.8     |                    |
|                   | Methyl                         | Symm      | -5.3                          | 3.71                                 | 3.80                               | 3.84                                | 4.45                                | 4.12                                 | 3.95                                 | 3.17                                    | 2.96                                    | 2.45                                   | -                | -                 | 4.19                           | -17.8     |                    |
|                   | Carbonyl                       | Semi-Symm | -14.1                         | 3.87                                 | 4.03                               | 3.74                                | 3.69                                | 3.78                                 | 4.24                                 | 2.97                                    | 3.49                                    | -                                      | 3.19             | 2.02              | 3.36                           | -42.1     |                    |
|                   | Oxygen, Methyl                 | Non-Symm  | -10.8                         | -                                    | -                                  | 4.31                                | -                                   | 3.88                                 | -                                    | 3.02                                    | -                                       | -                                      | 3.12             | 2.08              | 4.24                           | -29.7     |                    |
